# Supplementary material for: Impacts of Sea Ice Leads on Sea Salt Aerosols and Atmospheric Chemistry in the Arctic
Source: Copernicus journal article supplement (doi:10.5194/egusphere-2024-3147), 2024-10-17
Supplement: Supplementary file 1 [file egusphere-2024-3147-supplement.pdf]

1 **Impacts of Sea Ice Leads on Sea Salt Aerosols and Atmospheric Chemistry in the Arctic**

2 **Supplemental Information**

3 Erin J. Emme<sup>1,\*</sup>; Hannah M. Horowitz<sup>1,2,\*</sup>

4

5 **<sup>1</sup>Department of Civil and Environmental Engineering, University of Illinois Urbana-**  
6 **Champaign, Urbana, Illinois, USA**

7 **<sup>2</sup>Department of Atmospheric Science, University of Illinois Urbana-Champaign, Urbana,**  
8 **Illinois, USA**

9

10

11

12

13

14

15

---

16 \*Corresponding author: Erin J. Emme, [emme2@illinois.edu](mailto:emme2@illinois.edu), and Hannah M. Horowitz,

17 hmhorow@illinois.edu

18

19

20 Equation S.1. Wind speed and sea surface temperature SSA number source function in GEOS-  
21 Chem from Jaegle et al. (2011).

22

$$23 \frac{dF}{dr_{80}} = (0.3 + 0.1 \times T - 0.0076 \times T^2 + 0.00021 \times T^3) 1.373 u_{10m}^{3.41} r_{80}^{-A} (1 + 0.057 r_{80}^{3.45}) \times 10^{1.607 e^{-B^2}}$$

24

25 Where  $\frac{dF}{dr_{80}}$  expresses a density function in  $\text{m}^{-2} \text{s}^{-1} \mu\text{m}^{-1}$ ; T is the sea surface temperature (SST)  
26 expressed in °C;  $A = 4.7(1 + \Theta r_{80})^{-0.017 r_{80}^{-1.44}}$ ;  $B = [0.433 - \log_{10}(r_{80})]/0.433$ ;  $r_{80}$  is the particle  
27 radius at RH= 80% ( $r_{80} \sim 2r_{dry}$ );  $u_{10m}$  is the 10-meter wind speed; and  $\Theta$  is an adjustable  
28 parameter controlling the shape of the size distribution of submicron (recommended value of  $\Theta$   
29 = 30).

30

31 Equation S.2. SSA number source flux equation derived in Nilsson et al. (2001)

32

33

$$\log(F) = 0.20\bar{U} - 1.71$$

34

35 Where F is the number source flux in  $10^6 \text{ m}^{-2}\text{s}^{-1}$  and  $\bar{U}$  is the local wind speed.

November Multi-Year Average Lead Emissions Flux

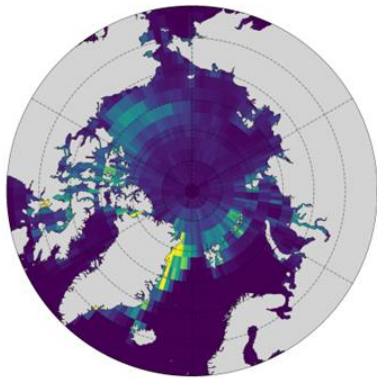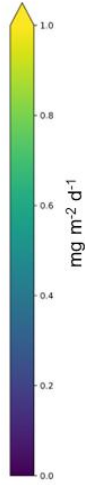

December Multi-Year Average Lead Emissions Flux

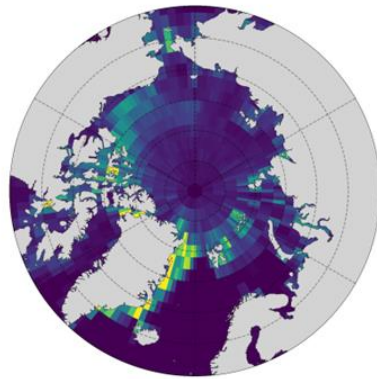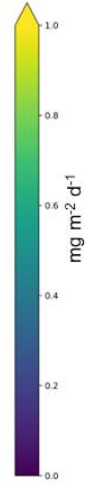

February Multi-Year Lead Emissions Flux

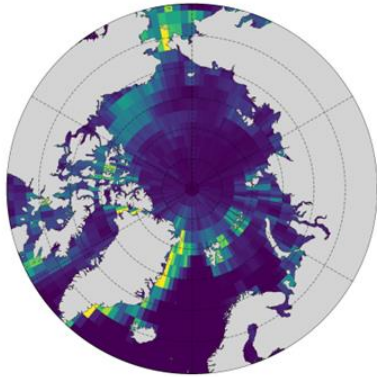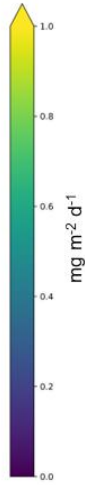

March Multi-Year Average Lead Emissions Flux

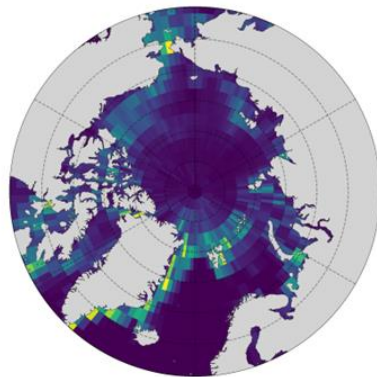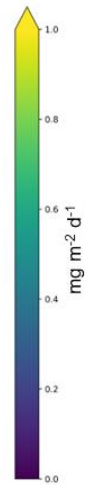

April Multi-Year Average Lead Emissions Flux

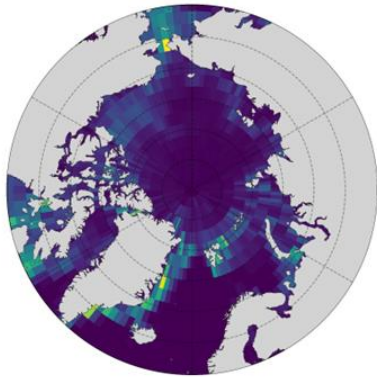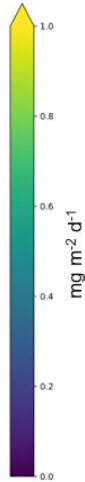

37 Figure S.1-Lead emissions totaled for months during the cold season.  
38

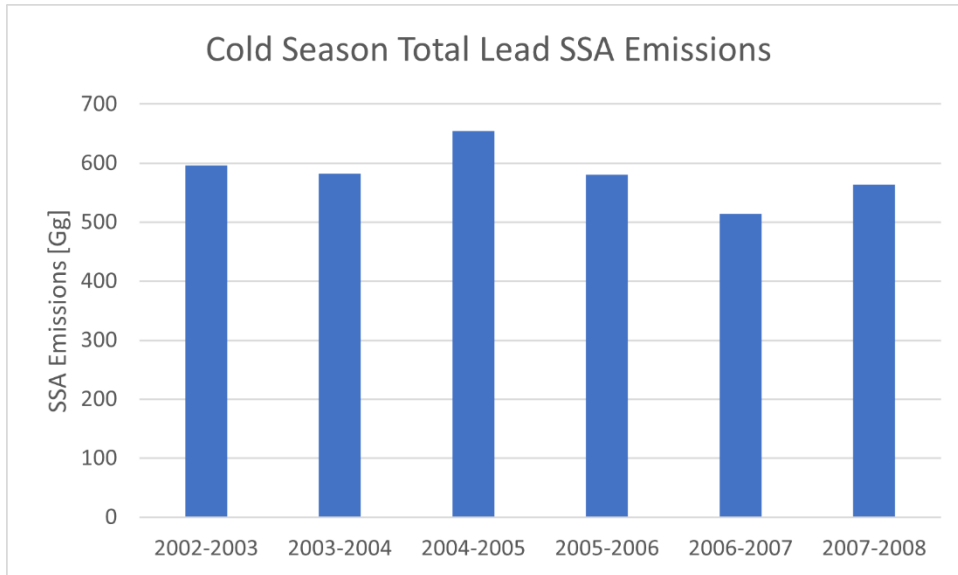

39  
40 Figure S.2- Cold Season Total Standard + Lead SSA Emissions.  
41

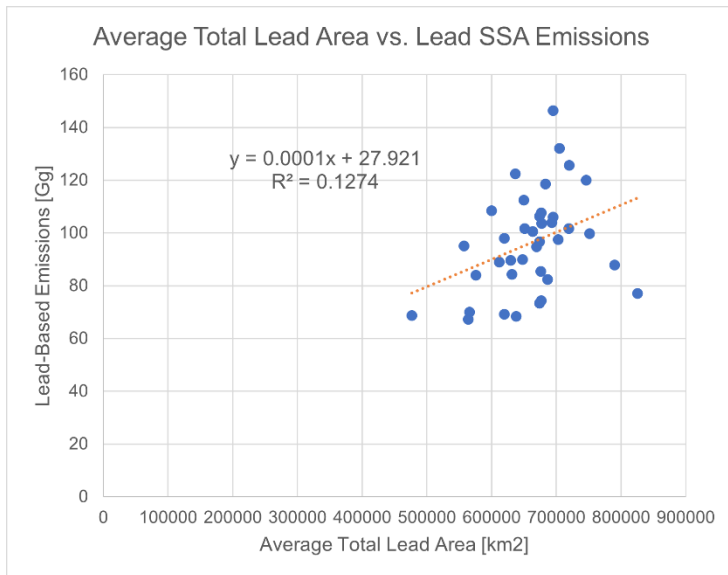

42  
43 Fig S.3 - Average total lead area (km<sup>2</sup>) vs. monthly lead emissions (Gg).  
44

45 Text S.1

46 The total monthly average lead area is calculated for each month separately by multiplying the  
47 monthly average lead fraction (from the daily AMSR-E files) in each grid cell by the grid cell area  
48 and summing all values. We correlate the monthly average total lead area and monthly lead  
49 emissions and find low correlation ( $R^2 = 0.1274$ ).  
50  
51  
52

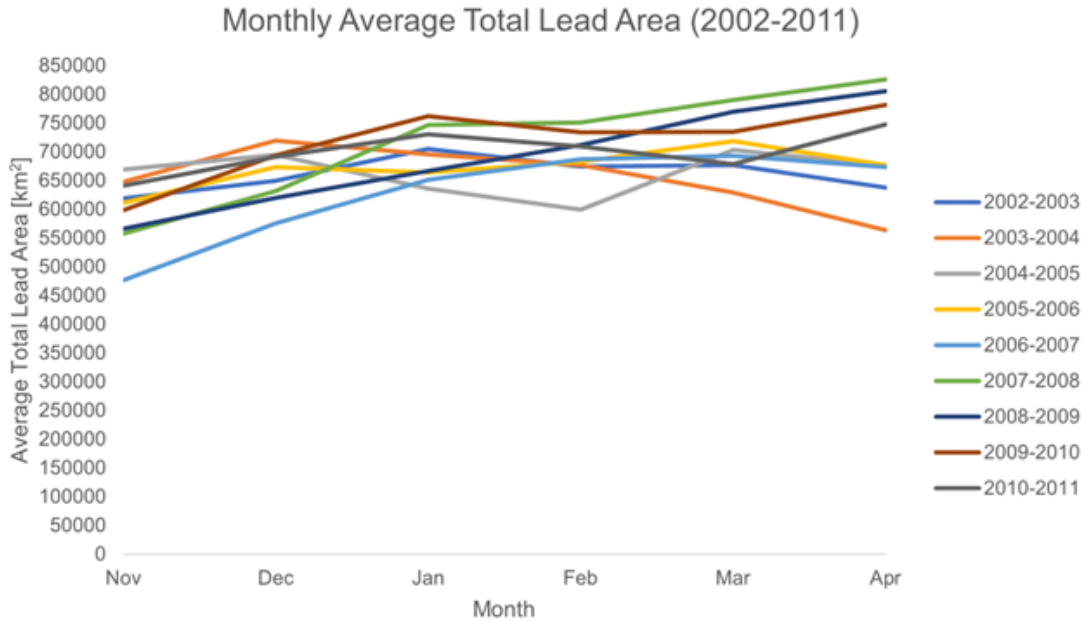

(a)

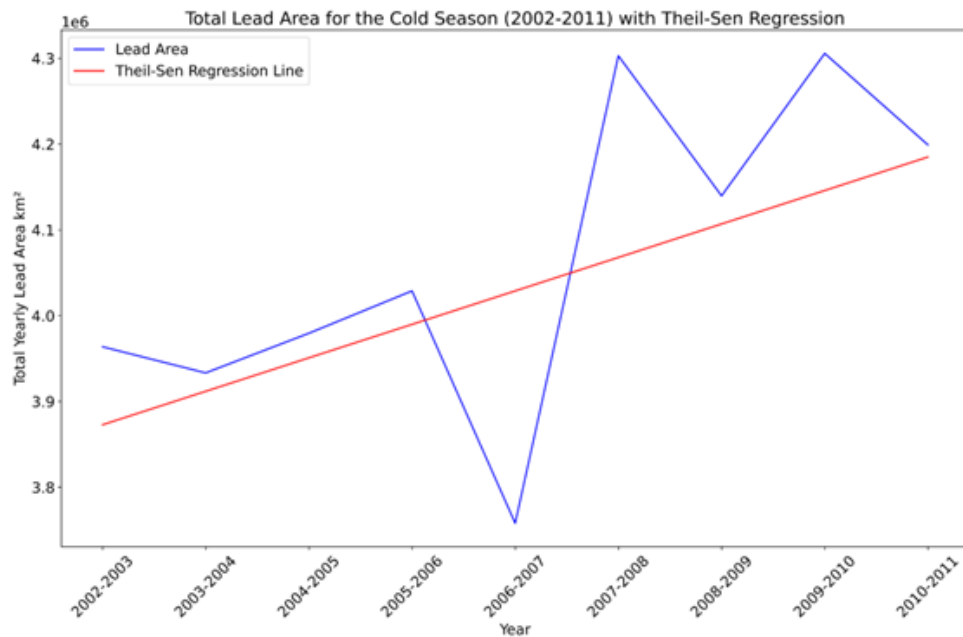

(b)

53 Figure S.4 - (a) Average monthly total lead area and (b) average lead area totaled over the cold  
 54 season (November – April) by year, for 2002-2011.

56  
 57 Text S.2

58 To assess the trend in the total lead area for each cold season from 2002-2011 (blue line in  
 59 Figure S.4 above) we employ a Theil-Sen regression method (red line in Figure S.4 above).  
 60 This analysis reveals a statistically significant positive trend, with a slope of +39,018.5 km<sup>2</sup>/year  
 61 (95% Confidence Interval: 1,385 to 69,217.5 km<sup>2</sup>/year).

62

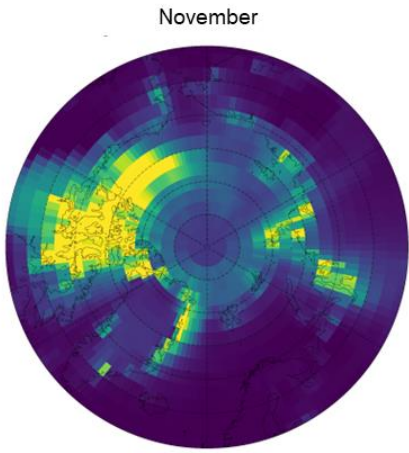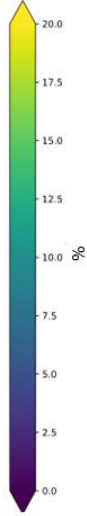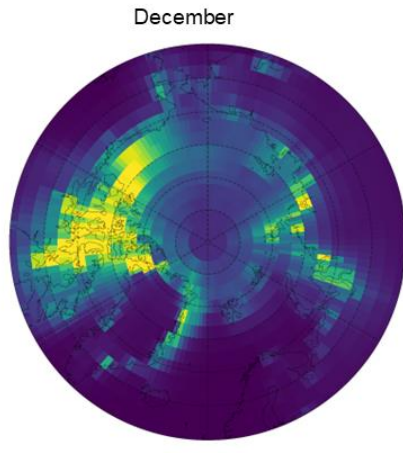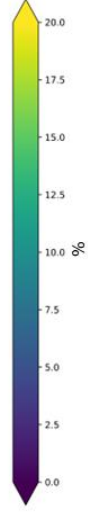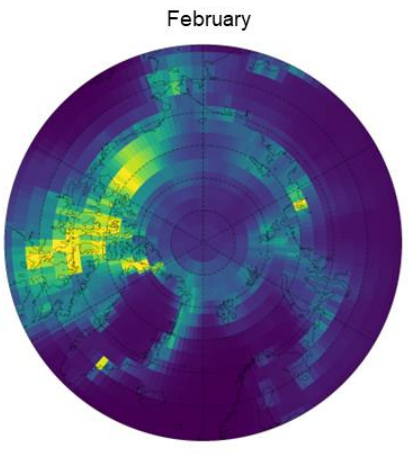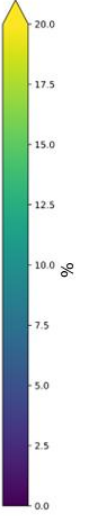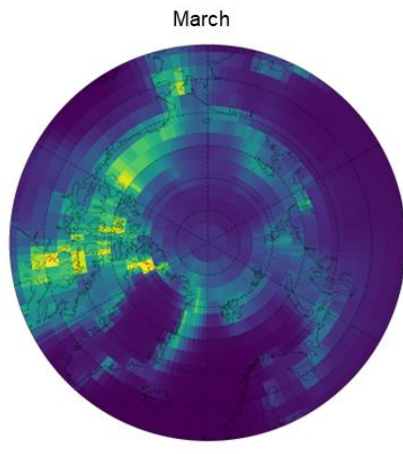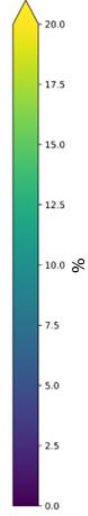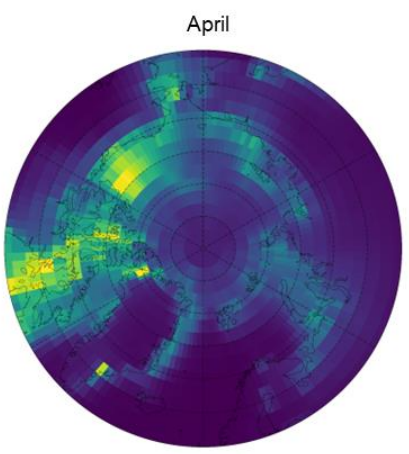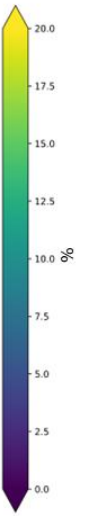

64 Figure S.5- Multi-year average percent increase in SSA concentration due to leads (calculated  
65 with Eq. (1)) for other months during the cold season.  
66

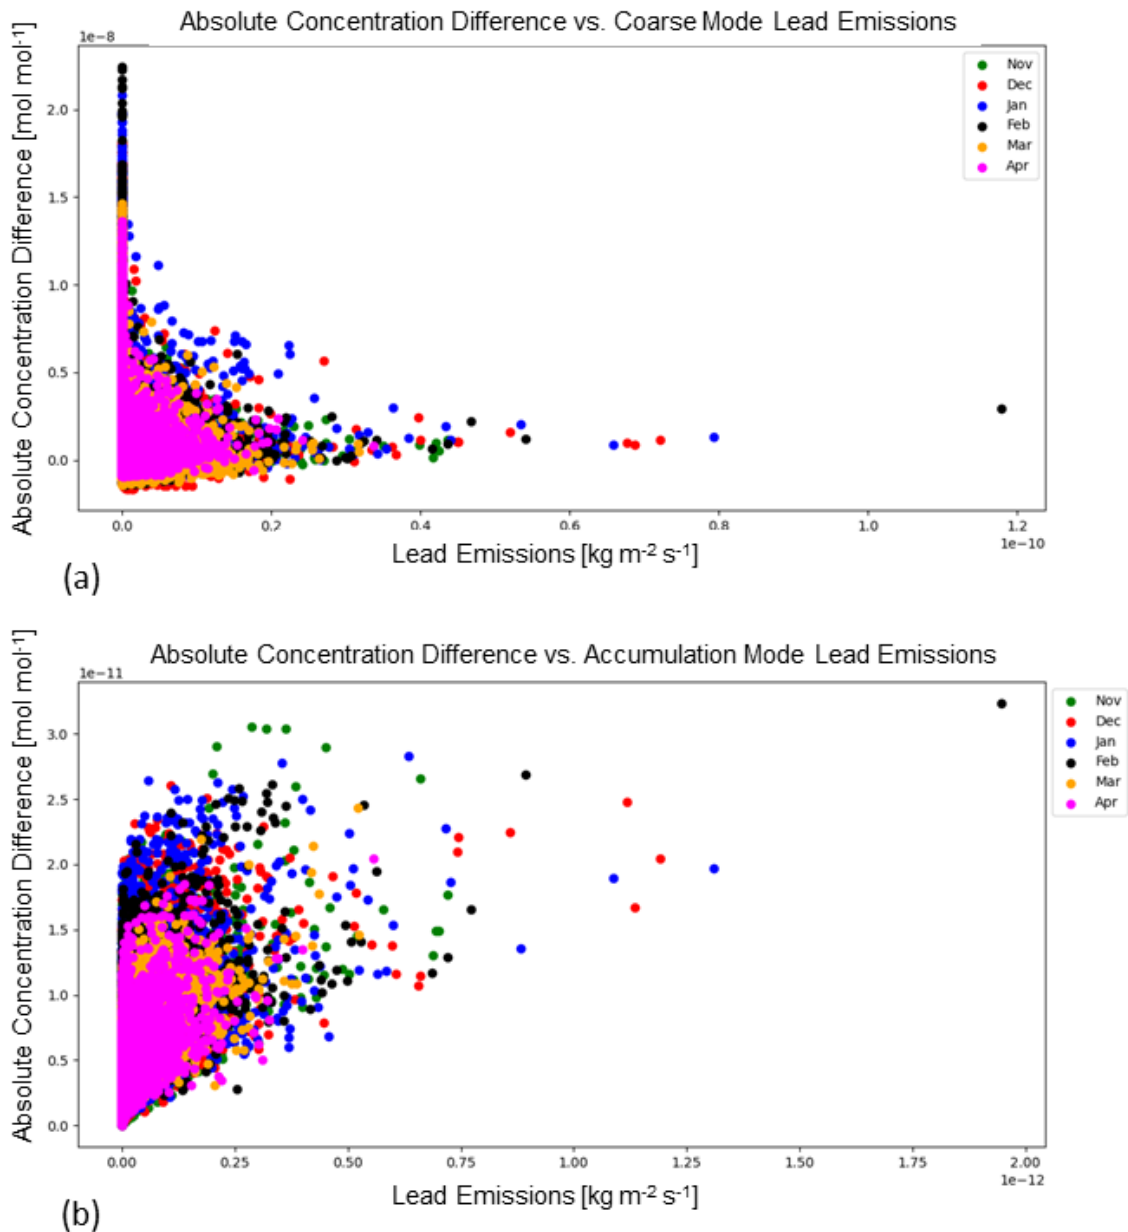

67 Figure S.6- Lead Emissions vs. absolute difference in SSA concentration between the  
68 standard+leads and standard models for (a) coarse mode and (b) accumulation mode.  
69

70  
71 Text S.3

72 To better understand the deposition and lifetime of the coarse and accumulation mode lead-based  
73 SSA, we correlate the lead-based emissions with the absolute difference between the  
74 standard+leads and standard SSA concentrations for each size bin (Figure S.6). Coarse mode  
75 SSA dominates the total mass of SSA (note the different y-axes for both figures). We find evidence

76 that the coarse mode SSA emitted from leads have long enough lifetimes in the atmosphere to  
77 be transported to regions of the Arctic where lead emissions are zero (many points on Figure S.6a  
78 where the absolute concentration difference is larger than 0 when lead emissions are 0). This  
79 also occurs for accumulation mode particles (Figure S.6b).  
80



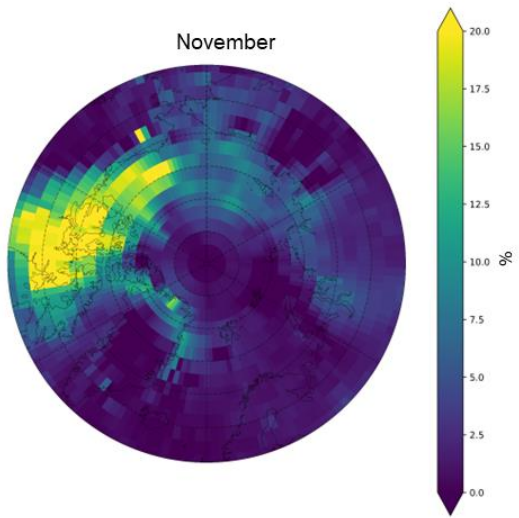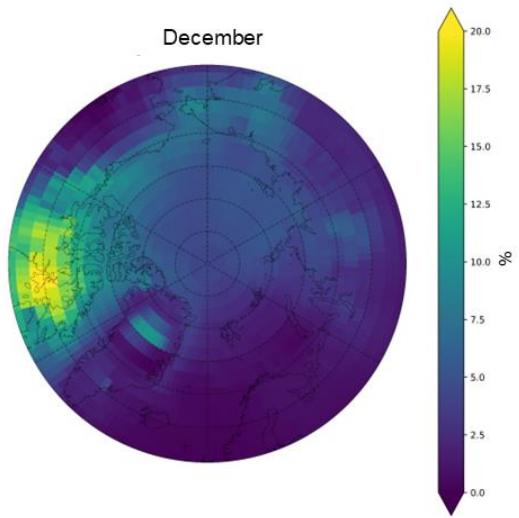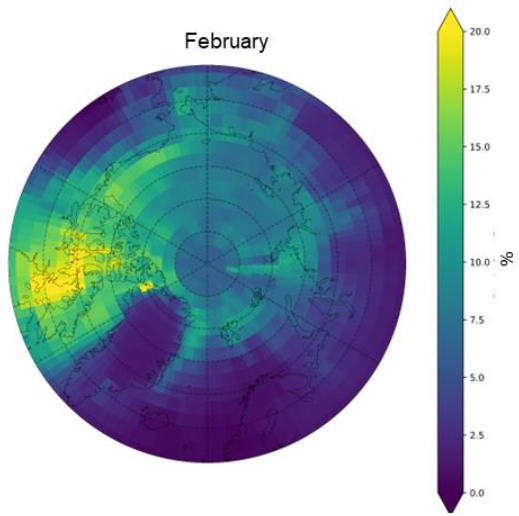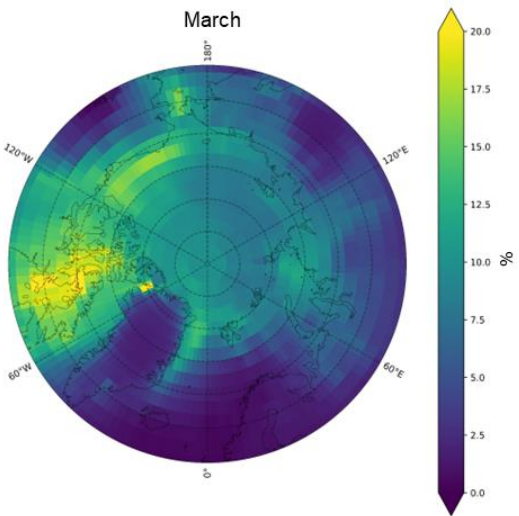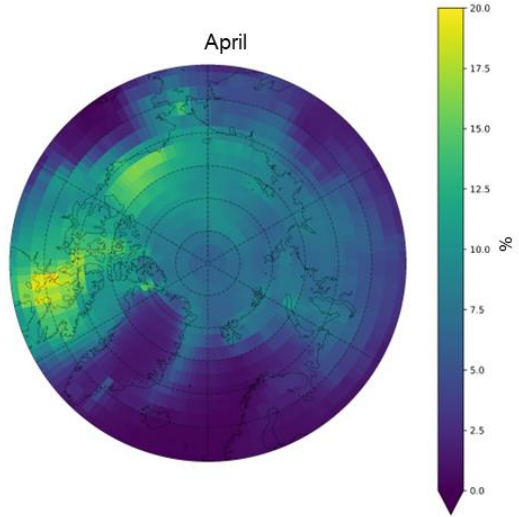

82 Figure S.7- Multi-year average percent increase in Br concentration due to leads (calculated  
 83 with Eq. (1)) for other months during the cold season.  
 84

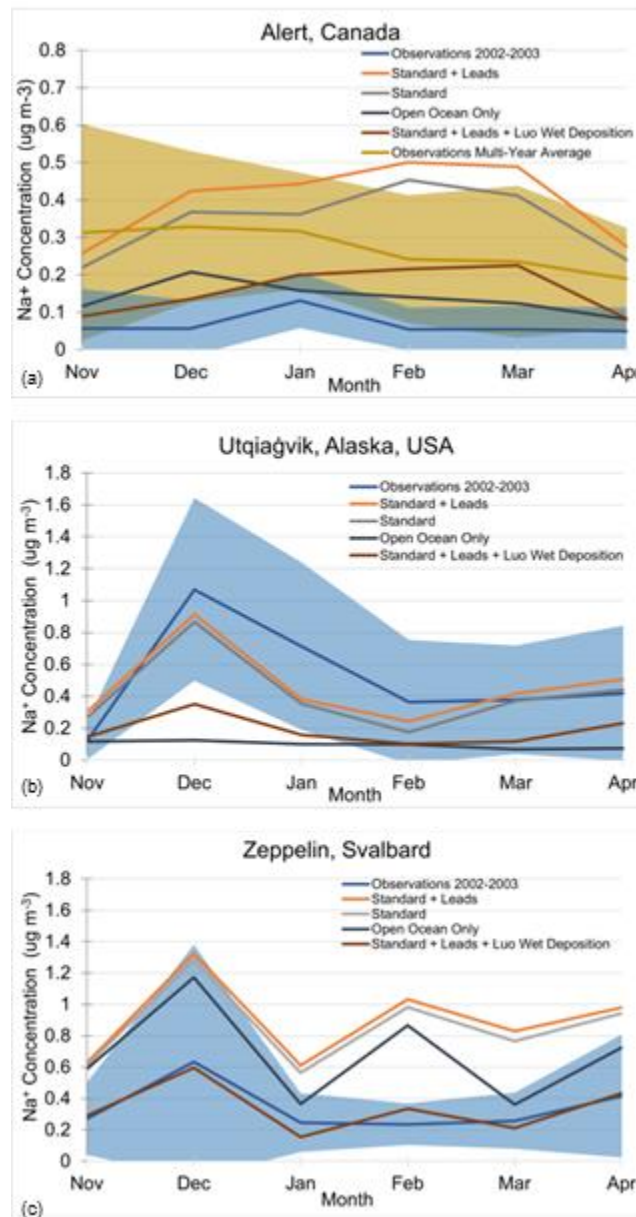

85  
 86 Figure S.8- Model evaluation for the cold season 2002-2003. Observed (blue + standard  
 87 deviation margin)  $\text{Na}^+$  concentrations are monthly averages for 2002-2003, and we add the  
 88 multi-year average observed monthly concentration (gold + standard deviation margin) due to  
 89 the low observed monthly concentrations in 2002-2003. We show monthly average modeled  
 90  $\text{Na}^+$  concentrations for 2002-2003 for the standard + leads (orange) and standard (blue) with  
 91 two additional sensitivity studies: open ocean only emissions contributing to  $\text{Na}^+$  concentrations  
 92 (dark navy blue) and the standard + leads emissions with Luo Wet Deposition applied to the  
 93 GEOS-Chem full-chemistry run (red). Note the different axis for Alert (a), as concentrations are  
 94 much lower at this site.

95  
 96 Text S.4

97 We run two additional sensitivity simulations to test the possible sources of overestimation in the  
98 model. For the first (“standard + leads + Luo Wet Deposition”), we use the calculated emissions  
99 of the standard leads from HEMCO and apply the Luo Wet Deposition scheme to the full-  
100 chemistry GEOS-Chem run. The Luo wet deposition scheme includes updated to pH  
101 calculations for cloud, rain, and wet surfaces; the fraction of cloud available for aqueous-phase  
102 chemistry; the rainout efficiencies for various cloud types; empirical washout by rain and snow;  
103 and wet surface uptake during dry deposition. We utilize the same approach of spin-up as the  
104 full standard + leads case, by running one year (November 1, 2002-November 1, 2003) and  
105 then run the simulation for analysis from November 2002 to April 2003, with the spun-up  
106 November 1, 2003, initial conditions. For the second sensitivity simulation (“open ocean only”)  
107 we run HEMCO to calculate the open ocean only emissions by turning off blowing snow  
108 emissions. We calculate emissions starting November 1, 2001, which we use to spin-up the full  
109 chemistry GEOS-Chem run. We spin-up the GEOS-Chem simulation from November 1, 2001,  
110 to November 1, 2002, and run the simulation for analysis from November 2002 to April 2003.  
111
